# Six-Month Treatment With Alendronate in Acute Charcot Neuroarthropathy

A randomized controlled trial

DARIO PITOCO, MD  
VALERIA RUOTOLO, MD  
SALVATORE CAPUTO, MD  
LORENA MANCINI, MD

CHIARA M. COLLINA, MD  
ANDREA MANTO, MD  
PAOLO CARADONNA, MD  
GIOVANNI GHIRLANDA, MD

Charcot neuroarthropathy is defined by painful or relatively painless bone and joint deformity in limbs that have lost sensory innervation (1). The incidence is ~0.1–5% in diabetic patients with peripheral neuropathy (2,3). The pathogenesis of Charcot neuroarthropathy is unknown (1,4). In acute Charcot neuroarthropathy, osteoclast activity increases (5). Alendronate is a bisphosphonate that induces the apoptosis of the osteoclasts (6). The utilization of the alendronate could improve the clinical signs of acute Charcot neuroarthropathy and stop bone reabsorption.

## RESEARCH DESIGN AND METHODS

— A total of 20 consecutive patients with a new diagnosis of acute painful Charcot neuroarthropathy were enrolled after the approval of the ethics committee. The patients gave informed consent. Acute Charcot neuroarthropathy was defined on the basis of at least three of the following clinical signs: edema, erythema, and skin temperature increase of 2°C compared with contralateral foot (temperature was measured using an infrared thermometer [Riester] at the site of the maximum deformity of the affected foot and on a similar site on the contralateral foot), deformity, tenderness, abnormal motility, and palpatory crunches.

According to a blinded randomization, 11 patients, who were treated with 70 mg alendronate by mouth once a week (test group), and 9 control subjects were followed for 6 months. All patients received a total contact cast boot for the first 2 months and pneumatic walker for the other 4 months and were examined twice a week (7). Afterward they were transferred to special shoes. Baseline levels of pain were recorded by using 10-cm visual analog scales (VASs), where 0 was minimal and 10 was maximal pain. Repeat VASs of pain were performed after 6 months. X-rays of the affected feet were taken in two different projections, according to the protocol described by Cavanagh et al. (8). A labeled white cell (In-WBC) bone scan combined with a three-phase technetium bone scan (Tc-MDP) and with magnetic resonance of the foot (9) were done to obtain a differential diagnosis with osteomyelitis.

Serum collagen COOH-terminal telopeptide of type 1 collagen (ICTP), osteocalcin, testosterone, estradiol, thyroid hormones, parathyroid hormone, follicle-stimulating hormone, and leutinizing hormone were measured in serum by immunoassay in electrochemiluminescence (Roche, Montclair, NJ).

IGF-1 and calcitriol were measured by chemiluminescence (Nichols), estron

by immunoradiometric assay (Immuno- tech Beckman, Fullerton, CA), and urinary hydroxyprolin through high-performance liquid chromatography (Biorad, Richmond, CA) from 24-h urine collection.

Serum alkaline phosphatase was measured by colorimetric assay (Roche-Hitachi) and serum bone alkaline phosphatase by electrophoretic method (Isopal Sebia ITA). Bone mineral density (BMD) measurements of the lumbar spine (L2-L4), proximal femur, and feet were performed by dual-energy X-ray absorptiometry using a Hologic QDR 2000 densitometer. The affected foot was manually positioned on the scan table and the scan started at the toes and moved toward calcaneus. The software used for the lumbar spine was automatically applied to the foot scan. Determination of size and location of the region of interest (phalanx, tarsus, or metatarsus) was made manually, and the measure of the BMD of the single region of interest was defined automatically by the spinal software. Reproducibility was assessed by taking 10 repeated measurements; the foot was moved and repositioned between measurements. ANOVA was used to compare the test group and the control group. Significance was set at  $P < 0.05$ .

**RESULTS** — All patients had a Neuropathy Disability Score  $>5$  (10), a pathological conduction velocity, a vibration perception threshold  $>25$  volts (11), and an autonomic neuropathy according to Ewing and Clarke with a score  $>4$  (12). No subjects had osteomyelitis or peripheral vascular disease (defined as an ankle-brachial index of  $<0.9$ ) throughout the study (Table 1). The midfoot was the most affected. Five patients had uninfected foot ulcers (cultures of debrided tissue were always negative) that healed during the study.

ICTP did not show significant difference between the two groups ( $0.54 \pm 0.05$  vs.  $0.56 \pm 0.06$  ng/ml,  $P < 0.6$ ) at the outset, but after 6 months, the test

From the Internal Medicine Institute, Catholic University, Rome, Italy.

Address correspondence and reprint requests to Dr. Dario Pitocco, Internal Medicine Institute, Catholic University, L.go A.Gemelli 8, 00168, Rome, Italy. E-mail: dariopitocco@virgilio.it.

**Abbreviations:** BMD, bone mineral density; ICTP, COOH-terminal telopeptide of type 1 collagen; VAS, visual analog scale.

Received for publication 20 January 2005 and accepted in revised form 26 January 2005.

D.P. and V.R. contributed equally to this work.

A table elsewhere in this issue shows conventional and Système International (SI) units and conversion factors for many substances.

© 2005 by the American Diabetes Association.

The costs of publication of this article were defrayed in part by the payment of page charges. This article must therefore be hereby marked "advertisement" in accordance with 18 U.S.C. Section 1734 solely to indicate this fact.

Table 1—Test group results

|                                           | At the outset | After 6 months |
|-------------------------------------------|---------------|----------------|
| ICTP (ng/ml)                              | 0.56 ± 0.06   | 0.30 ± 0.03    |
| Urinary hydroxyprolin (mg/l)              | 18 ± 3.2      | 13 ± 3.6       |
| BMD foot (g/cm <sup>2</sup> )             | 0.18 ± 0.06   | 0.24 ± 0.08    |
| BMD distal phalanxes (g/cm <sup>2</sup> ) | 0.194 ± 0.03  | 0.242 ± 0.05   |
| VAS pain score                            | 6.5 ± 0.9     | 4.2 ± 0.8      |
| IGF-1 (ng/ml)                             | 142.8 ± 24    | 123.5 ± 41     |

Data are means ± SD.

group showed a significant decrease (0.54 ± 0.05 vs. 0.30 ± 0.03 ng/ml, *P* < 0.05). In the test group, hydroxyprolin followed the same trend (18 ± 3.2 vs. 13 ± 3.6 mg/l, *P* < 0.05). Bone alkaline phosphatase reduction was almost significant (36 ± 4.8 vs. 23 ± 3.9%, *P* = 0.06). Dual-energy X-ray absorptiometry demonstrated an improvement in total foot mineralization (0.18 ± 0.06 vs. 0.24 ± 0.08 g/cm<sup>2</sup>, *P* < 0.05) and in the distal phalanxes (0.194 ± 0.03 vs. 0.242 ± 0.05 g/cm<sup>2</sup>, *P* < 0.01) in the test group that had an improvement of the mineralization of the femur. VAS score for pain was significantly improved in the test group (6.5 ± 0.9 vs. 4.2 ± 0.8, *P* < 0.05). No significant changes were evident in the control group (6.7 ± 1 vs. 6.1 ± 1.1).

At the outset, the affected foot was 3.6 ± 1.1°C hotter in the test group and 3.4 ± 1.2°C hotter in the control group. After 6 months, both groups had a significant improvement (−1.7°C in the test group and −1.5°C in the control group). Reduction of IGF-1 was observed only in the test group (142.8 ± 24 vs. 123.5 ± 41 ng/ml, *P* < 0.05). No side effects were reported.

**CONCLUSIONS**— This study is based on the utilization of alendronate taken by mouth to stop the progression of Charcot neuroarthropathy (13). After 6 months, we showed that there is a significant reduction of ICTP and hydroxyprolin, markers indicative of bone reabsorption. The test group showed an increase of the foot bone density compared with the control group that was more evident in the distal phalanxes, which were the foot bones with the lowest BMD, than in the midfoot. We suppose that bisphosphonates are more effective where bone reabsorption is more marked. The significant reduction of IGF-1 levels

in the test group could improve bone density, lowering the blood supply to bones (14).

Off-loading, which reduces inflammation, together with alendronate, which decreases the cytokine production within the bones of the foot, could explain the reduction of pain (15,16). Furthermore, bisphosphonates have a central antinociceptive effect connected with the Ca<sup>2+</sup> mechanism. Ca influx releases substances involved in nociception and inflammation, such as substance P, vasoactive intestinal peptide, neuropeptide Y, prostaglandin, serotonin, and kinines (17–19). We did not detect the initial fall of the temperature linked to the bisphosphonates because we checked it at the beginning and end of the study (20). In conclusion, we observed a clinical improvement of acute Charcot neuroarthropathy by using alendronate.

References

- Edmonds ME: Progress in care of the diabetic foot. *Lancet* 354:270–272, 1999
- Sanders LJ, Frykberg RG: Diabetic neuropathic osteoarthropathy: Charcot foot. In *The High Risk Foot in Diabetes Mellitus*. Levin ME, O’Neal LW, Bowker JH, Eds. New York, Churchill Livingstone, 1991, p. 297–338
- Rajbhandari SM, Jenkins RC, Davies C, Tesfaye S: Charcot neuroarthropathy in diabetes mellitus. *Diabetologia* 45:1085–1096, 2002
- Frykberg RG, Kozak GP: The diabetic charcot foot. In *Management of Diabetic Foot Problems*. 2nd ed. Kozak GP, Campbell DR, Fryberg RG, Haberwshaw GM, Eds. Philadelphia, WB Saunders, 1995, 88–97
- Piaggese A, Marcocci C, Golia F, Gregorio S, Baccetti F, Navalesi R: Markers for Charcot’s neurogenic osteoarthropathy in diabetic patients (Abstract). *Diabetes* 49 (Suppl. 1):A32, 2000

- Rogers MJ: New insights into the molecular mechanism of action of bisphosphonate. *Curr Pharm Des* 9:2643–2658, 2003
- Armstrong DG, Tood WF, Lavery LA, Harkless LB, Bushmann TR: The natural history of acute Charcot’s arthropathy in a diabetic foot speciality clinic. *Diabet Med* 14:357–363, 1997
- Cavanagh PR, Young MJ, Adams JE, Vickers KL, Boulton AJM: Radiographic abnormalities in the feet of patients with diabetic neuropathy. *Diabetes Care* 17: 201–209, 1994
- Tomas MB, Patel M, Marvin SE, Palestro CJ: The diabetic foot. *Br J Radiol* 73:443–450, 2000
- Young MJ, Boulton AJM, Macleod AF, Williams DRR, Sonksen PK: A multicentre study of the prevalence of diabetic peripheral neuropathy in the UK hospital clinic population. *Diabetologia* 36:150–154, 1993
- MJ Young, Breddy JL, Veves A, Boulton AJM: The prediction of diabetic neuropathic foot ulceration using vibration perception thresholds: a prospective study. *Diabetes Care* 17:557–560, 1994
- Ewing DJ, Clarke BF: Diagnosis and management of diabetic autonomic neuropathy. *BMJ* 285:916–918, 1982
- Jude EB, Boulton AJ: Medical treatment of Charcot’s arthropathy. *J Am Podiatr Med Assoc* 92:381–383, 2002
- Kapitola J, Zak J, Lacinova Z, Justova V: Effect of growth hormone and pamidronate on bone blood flow, bone mineral and IGF-I levels in the rat. *Physiol Res* 49 (Suppl. 1):S101–S106, 2000
- Mc Crory JL, Morag E, Norkitis AJ: Healing of Charcot fractures: skin temperature and radiographic correlates. *Foot* 8:158–165, 1998
- Haworth CD, Selby PL, Webb AK, Mawer EB, Adams JE, Freemont AJ: Severe bone pain after intravenous pamidronate in adult patients with cystic fibrosis. *Lancet* 352:1753–1754, 1998
- Bonabello A, Galmozzi MR, Bruzzese T, Zara GP: Analgesic effect of bisphosphonates in mice. *Pain* 91:269–275, 2001
- Carr DB, Goudas LC: Acute pain. *Lancet* 353:2051–2058, 1997
- Miranda HF, Bustamante D, Kramer V, Pelissier T, Saavedra H, Paele C, Fernandez E, Pinardi G: Antinociceptive effects of Ca<sup>2+</sup> channel blockers. *Eur J Pharmacol* 217:137–141, 1992
- Jude EB, Selby PL, Burgess J, Lilleystone P, Mawer EB, Page SR, Donohoe M, Foster AVM, Edmonds ME, Boulton AJM: Bisphosphonates in the treatment of Charcot neuroarthropathy: a double-blind randomised controlled trial. *Diabetologia* 44:2032–2037, 2001

Downloaded from http://ajph.aphspublishers.org/ by guest on April 17, 2024
